# Supplementary material for: The Apoptotic Effect of Caffeic or Chlorogenic Acid on the C32 Cells That Have Simultaneously Been Exposed to a Static Magnetic Field
Source: MDPI journal article supplement (doi:10.3390/ijms23073859), 2022-03-31
Supplement: s1 [file s1]

**Suppl. Table S1.** Characteristics of the primers that were used for real-time RT-qPCR

| Gene           | Accession number | Sequence of primers                                                 | T <sub>m</sub> of primers (°C) | T <sub>m</sub> of PCR amplicon (°C) | Thermal profile of one-step RT-PCR                                                                                                                    |
|----------------|------------------|---------------------------------------------------------------------|--------------------------------|-------------------------------------|-------------------------------------------------------------------------------------------------------------------------------------------------------|
| <i>Bax</i>     | NM_004324        | F: 5'- AACTGGACAGTAACATGGAG-3'<br>R: 5'- TTGCTGGCAAAGTAGAAAAG-3'    | 56.6<br>59.7                   | 88.4                                | reverse transcription<br>at 45°C for 10 min<br><br>activation<br>at 95°C for 2 min<br><br>40 cycles:<br>95°C for 5 s<br>60°C for 10 s<br>72°C for 5 s |
| <i>Bcl2</i>    | NM_000633        | F: 5'- GATTGTGGCCTTCTTTGAG-3'<br>R: 5'- GTTCCACAAAGGCATCC-3'        | 59.8<br>59.0                   | 87.1                                |                                                                                                                                                       |
| <i>BclXl</i>   | NM_001191        | F: 5'- ATCTCTTTCTCTCCCTTCAG -3'<br>R: 5'- TCTTTCTGGGAAAGCTTGTAG -3' | 59.8<br>58.7                   | 81.7                                |                                                                                                                                                       |
| <i>Casp3</i>   | NM_004346        | F: 5'- AAAGCACTGGAATGACATC -3'<br>R: 5'- CGCATCAATTCCACAATTTC -3'   | 57.6<br>62.8                   | 80.7                                |                                                                                                                                                       |
| <i>Casp9</i>   | NM_001229        | F: 5'- CTCTACTTTCCCAGGTTTGTG-3'<br>R: 5'- TTTCACCGAAACAGCATTAG -3'  | 57.9<br>60.3                   | 81.0                                |                                                                                                                                                       |
| <i>β-actin</i> | NM_001101        | F: 5'- GACGACATGGAGAAAATCTG-3'<br>R: 5'- ATGATCTGGGTCATCTTCTC-3'    | 59.7<br>58.0                   | 88.2                                |                                                                                                                                                       |

F – forward; R – reverse; T<sub>m</sub> – melting temperature
