# Supplementary material for: The Apoptotic Effect of Caffeic or Chlorogenic Acid on the C32 Cells That Have Simultaneously Been Exposed to a Static Magnetic Field
Source: MDPI journal article supplement (doi:10.3390/ijms23073859), 2022-03-31
Supplement: s1 [file s1]

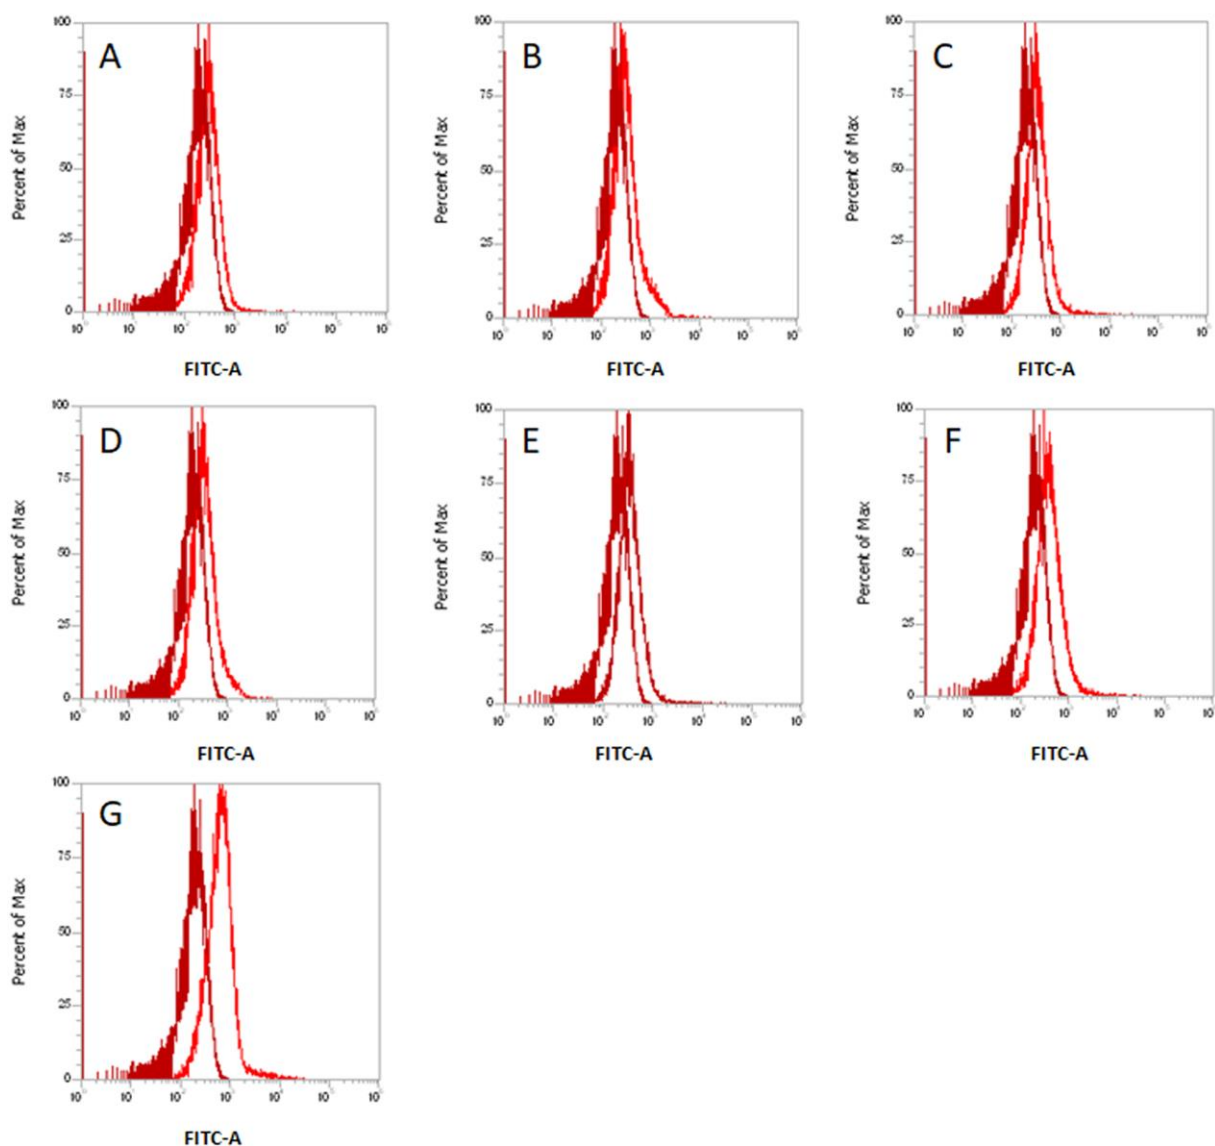

**Suppl. Figure S2.** Overlay of the histograms: untreated cells in ruby red and treated cells in red (A - control cultures; B - caffeic acid-treated C32 cells; C - chlorogenic acid-treated C32 cells; D - cells that had simultaneously been exposed to caffeic acid and a static magnetic field; E - cells that had simultaneously been exposed to chlorogenic acid and a static magnetic field; F - cells that had been exposed to a static magnetic field; G -  $\text{H}_2\text{O}_2$ -treated cells)
