# Supplementary figures and images for: The Apoptotic Effect of Caffeic or Chlorogenic Acid on the C32 Cells That Have Simultaneously Been Exposed to a Static Magnetic Field
Source: MDPI journal article supplement (doi:10.3390/ijms23073859), 2022-03-31

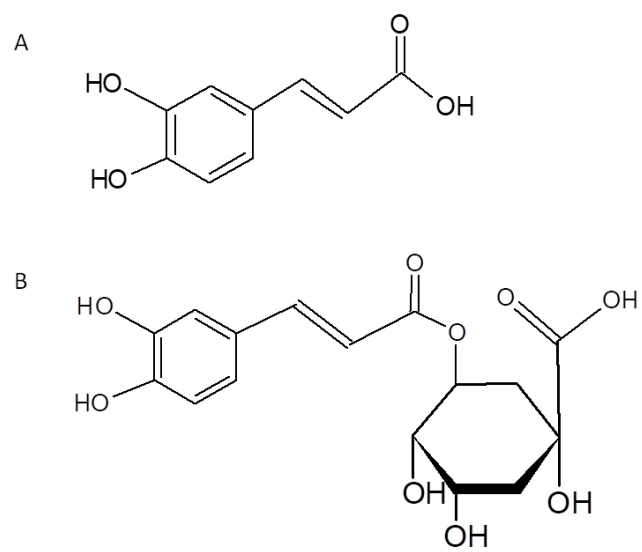

**Suppl. Figure S3.** Chemical structure of caffeic (A) and chlorogenic acid (B)

Supplement: s1 [file s1]
